# Supplementary material for: Photo-reactive polymers for the immobilisation of epidermal growth factors
Source: Royal Society of Chemistry journal article supplement (doi:10.1039/d2tb02040h), 2022-12-28
Supplement: d2tb02040h1.pdf [file d2tb02040h1.pdf]

## Supplementary data

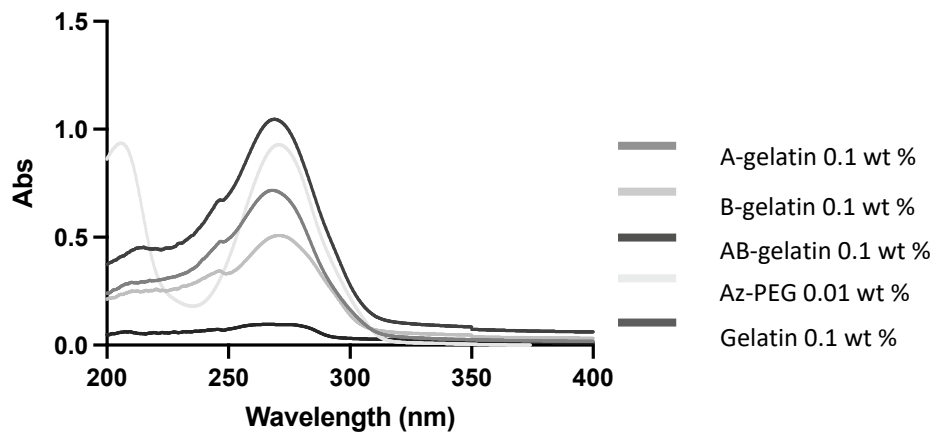

Fig. S1 UV absorbance spectra of different photo-reactive polymers.

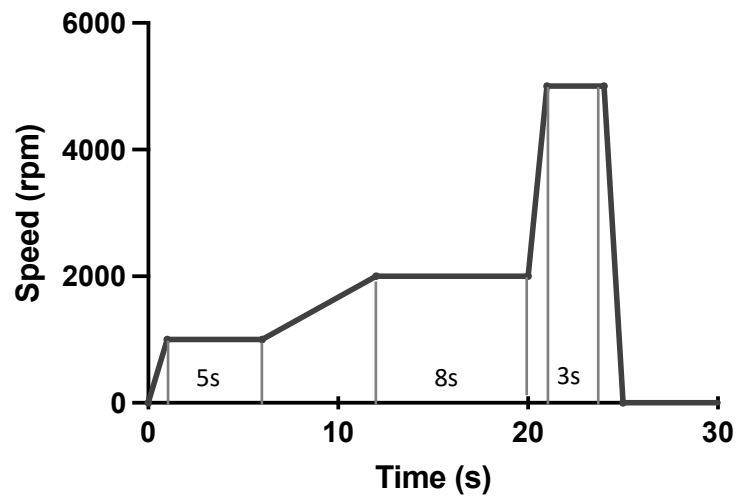

Fig. S2 Spin-coating condition.

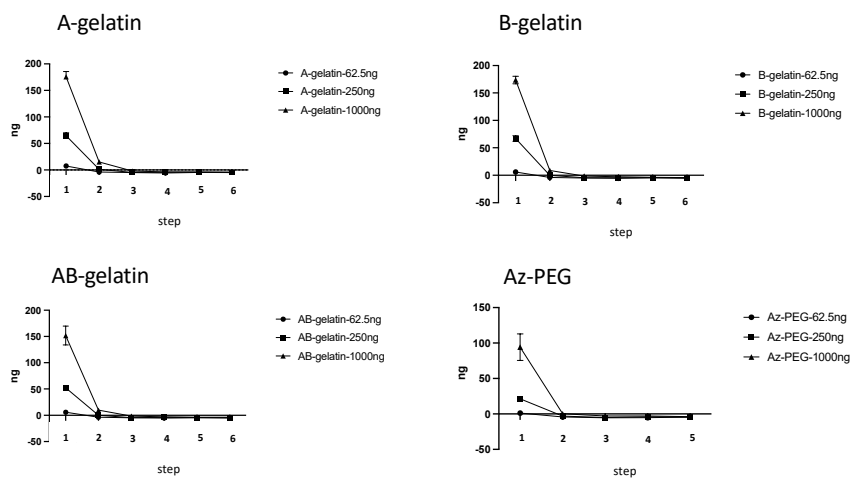

Fig. S3 Amount of EGF-FITC in the phosphate-buffered saline (PBS) wash after spin coating and photo-immobilisation.

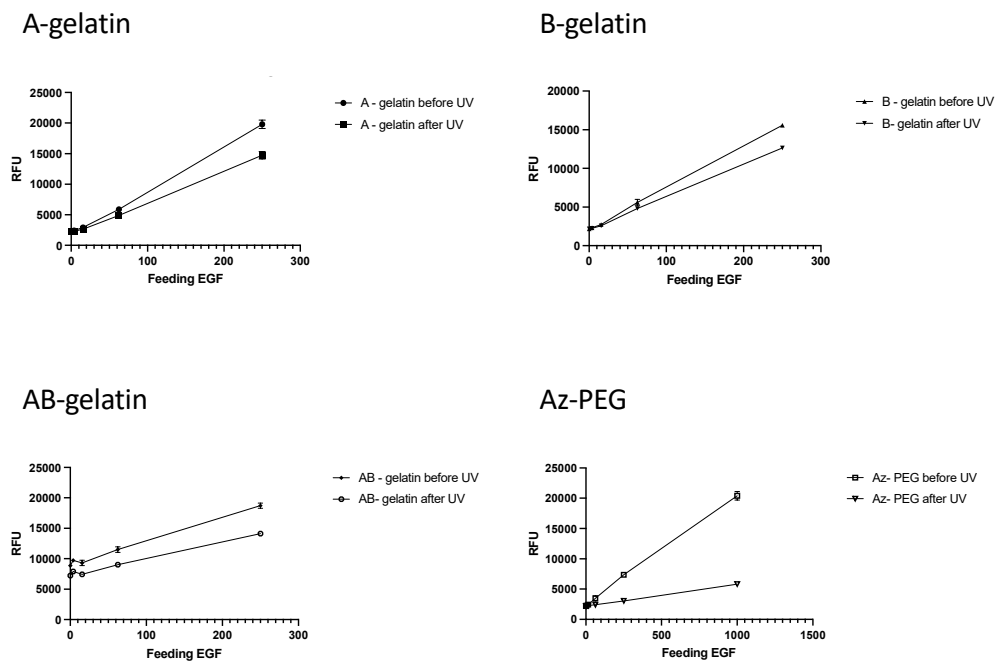

Fig. S4 Measurement of the amount of immobilised EGF. A known amount of EGF-FITC was dropped on the plate with the photo-reactive polymers and the fluorescence intensity (relative fluorescence unit; RFU) was measured before and after UV irradiation for determining immobilisation. The amounts of immobilised EGF, as shown in Table 3, were calculated using the calibration curves .

5

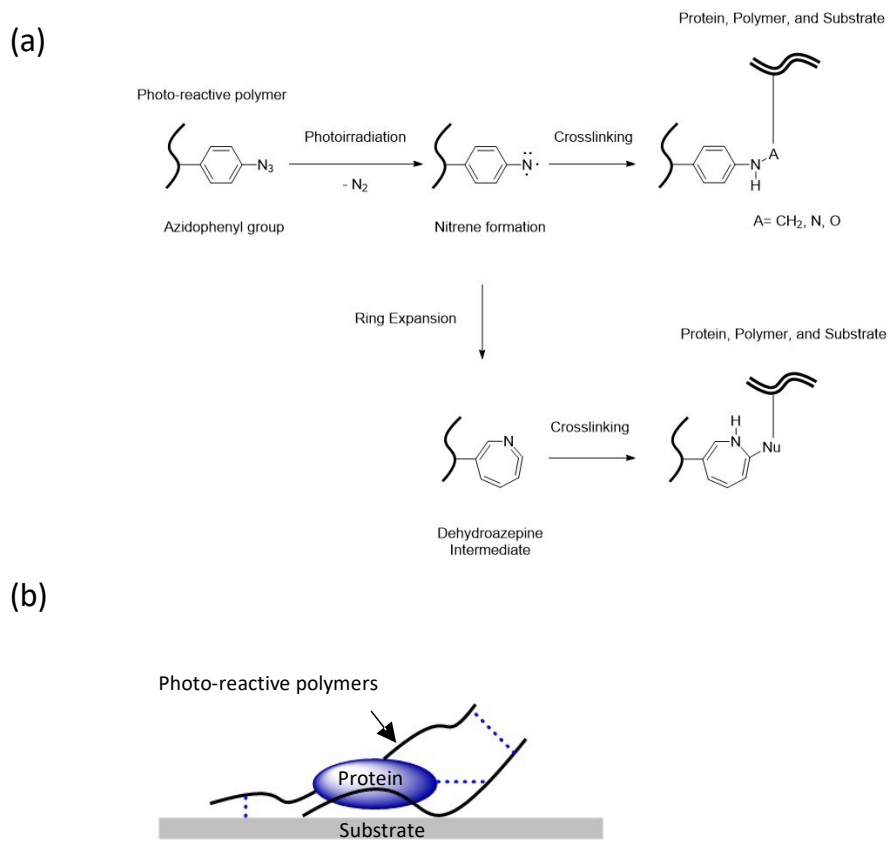

Fig. S5 Working mechanism of the azidophenyl group in the polymers. (a) Chemical reaction of the azidophenyl group after UV irradiation and (b) schematic illustration of the mechanism of immobilisation by cross-linking among photo-reactive polymers, EGF (protein), and substrate.

6

7

8

9

10

11

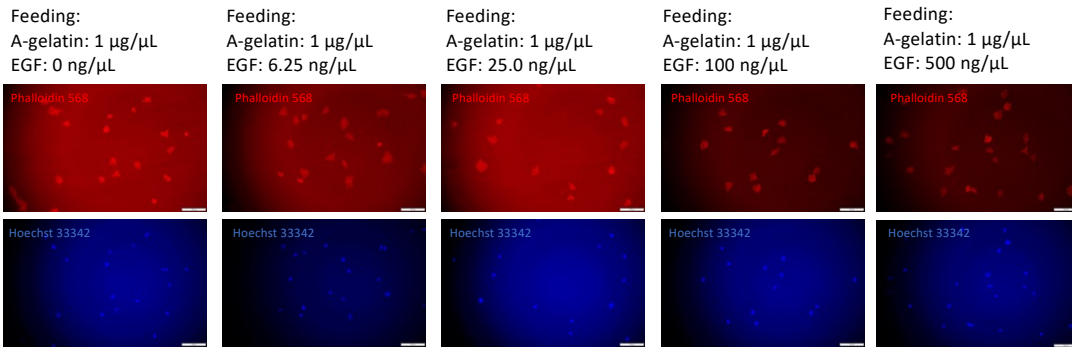

12

13

Fig. S6 Actin filament staining in NRK49F cells. Actin filaments (Red) were stained with Phalloidin-568 reagent and nuclei were stained with Hoechst 33342. Scale bar: 100  $\mu\text{m}$ .

14

15
